# Supplementary material for: Development of a Community-Based Integrated Service Model of Health and Social Care for Older Adults Living Alone
Source: MDPI journal article supplement (doi:10.3390/ijerph18020825), 2021-01-19
Supplement: s1 [file s1]

## Supplemental Figures

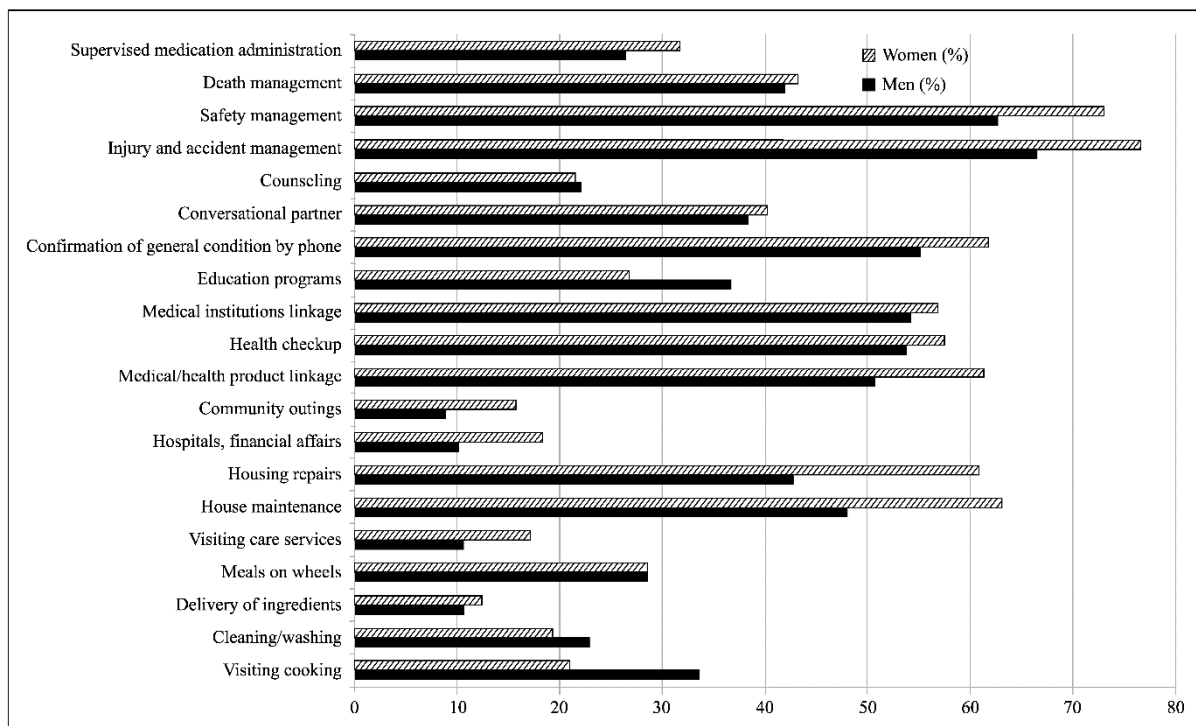

**Supplemental Figure S1.** Community service needs (first survey).

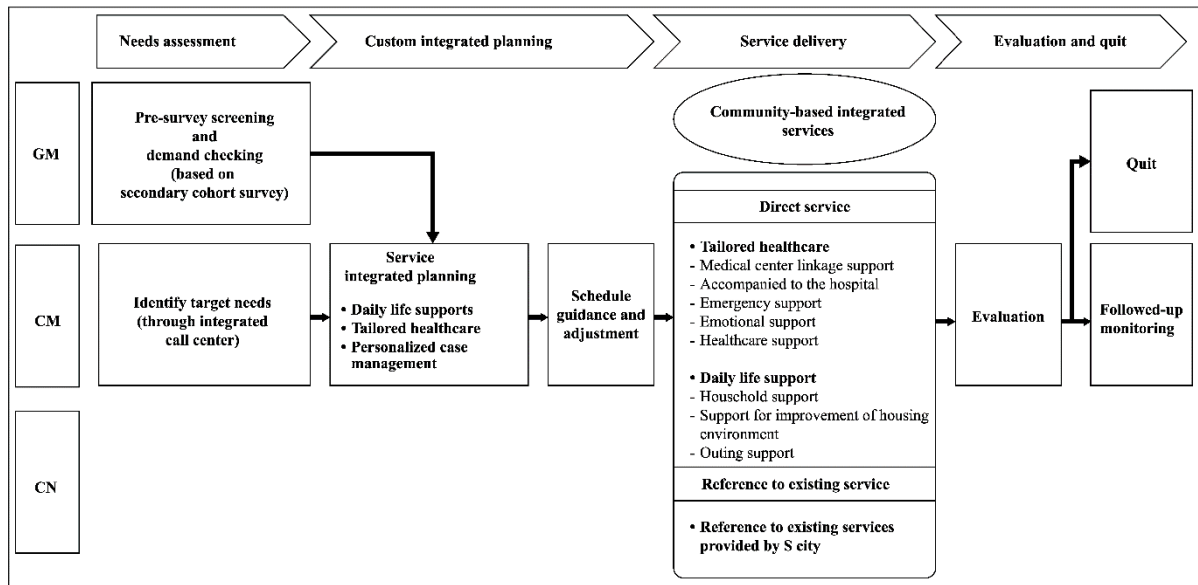

Supplemental Figure S2. Service delivery in the community-based integrated service model.

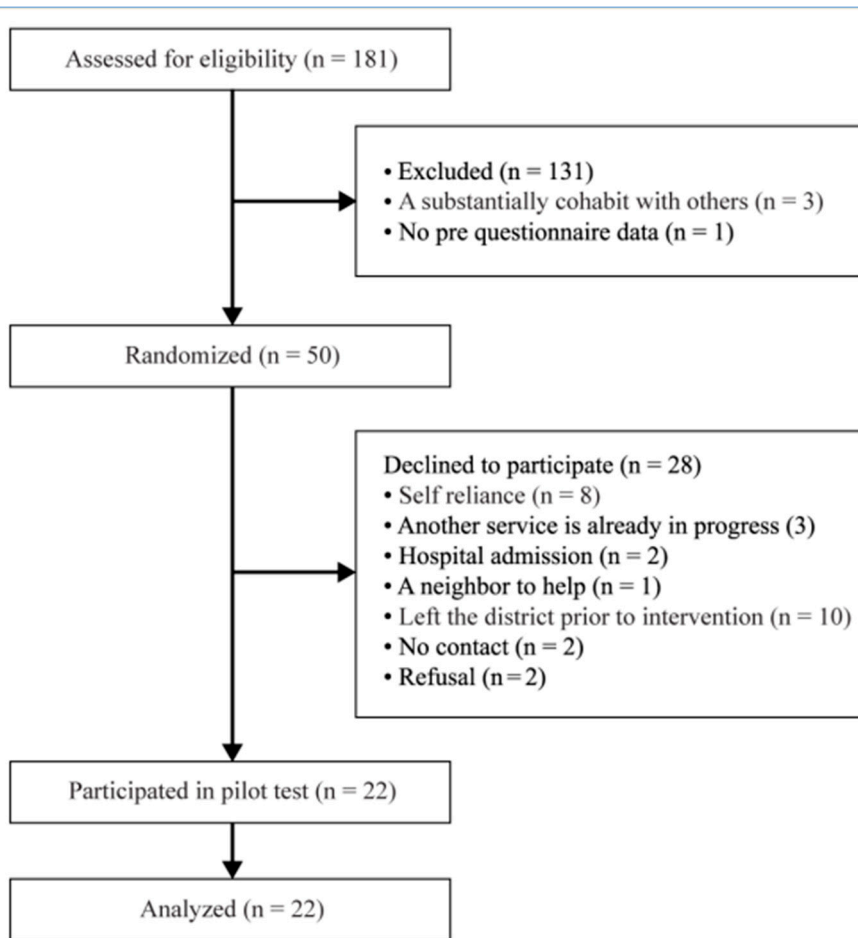

**Supplemental Figure S3.** Flow of participants through the study.

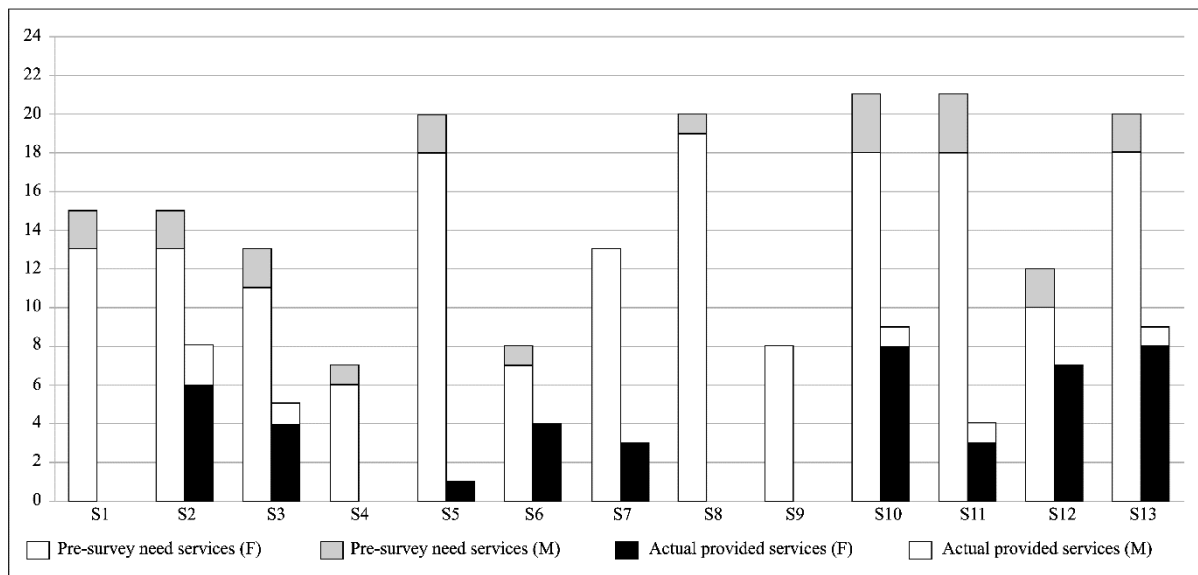

**Supplemental Figure S4.** Services provided in the pilot test per participants' sex. S1: meal preparation; S2: meals on wheels; S3: cleaning/washing; S4: delivery of groceries; S5: housing repairs; S6: fall prevention stickers; S7: community outings; S8: coordination of access to medical products and services; S9: accompanying to the hospital; S10: confirmation of general condition by phone; S11: conversational partner (visit + phone); S12: cognitive function-enhancing game; S13: supervised medication administration.
